# Supplementary material for: Disparate effects of antibiotic-induced microbiome change and enhanced fitness in Daphnia magna
Source: PLoS One. 2020 Jan 3;15(1):e0214833. doi: 10.1371/journal.pone.0214833 (PMC6941804; doi:10.1371/journal.pone.0214833)
Supplement: S5 Table — Generalized linear model output linking antioxidant capacity assayed by ORAC to daphnid body length across the treatments and time points. Normal error structure and log-link function were applied. The animals collected at the termination of the experiment were excluded, because they had eggs in the brood chambers, which may affect the ORAC values. (XLSX) [file pone.0214833.s006.xlsx]

## Sheet: Sheet1
Effect	Estimate	Standard Error	Wald stat.	p value
Intercept	-8.361	1.522	30.181	0
Body length	1.138	0.471	5.834	0.0157
Scale	0.00435	0.0004	96	0
